# Supplementary material
Source: PubMed Central journal article supplement (PMC4576110)
Supplement: AAC.00027-15_zac009154371so1.pdf [file AAC.00027-15_zac009154371so1.pdf]

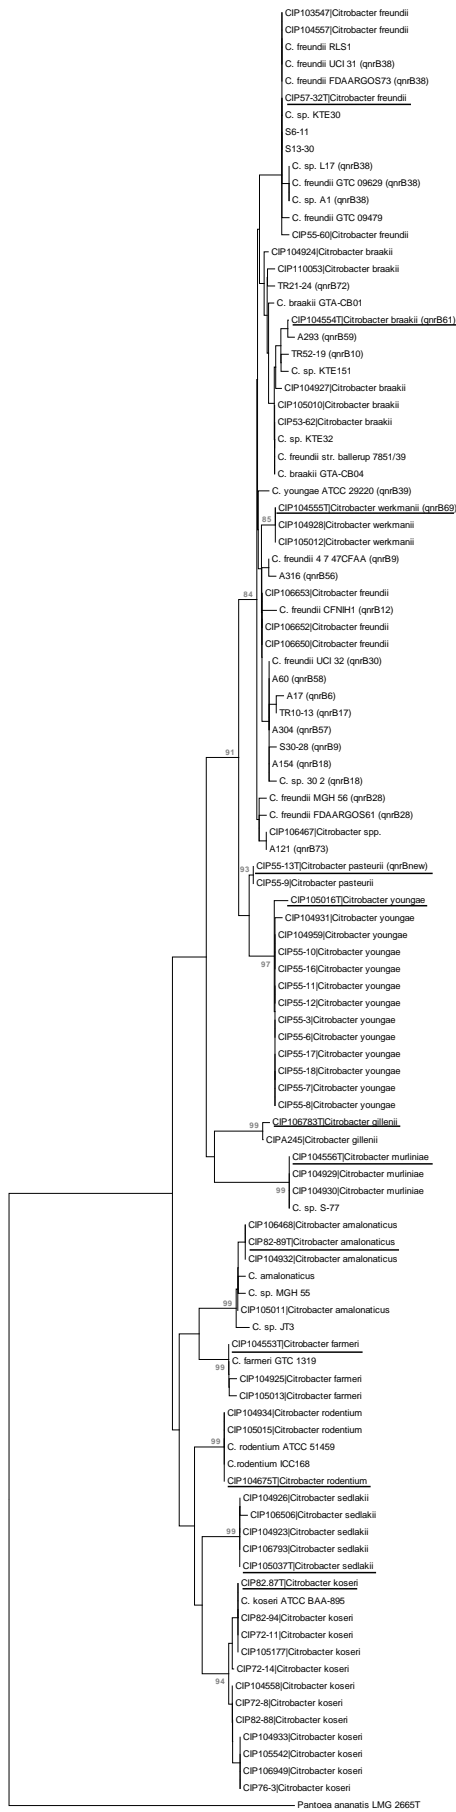

0.05

**FIG S1. Affiliation of LeuS amino acid sequences.** Genetic distances were constructed using Jones-Taylor-Thornton (JTT) model. Numbers at branch points indicate bootstrap percentages from Neighbor-Joining method analysis and only values greater than 80% are shown. Horizontal Bar: genetic distance of 0.05. All the different *Citrobacter* spp. type strains are underlined and *qnrB* alleles are shown in parentheses. *Pantoea ananatis* LMG 2665<sup>T</sup> was used as outgroup (PATRIC ID fig|1378093.3.peg.600).

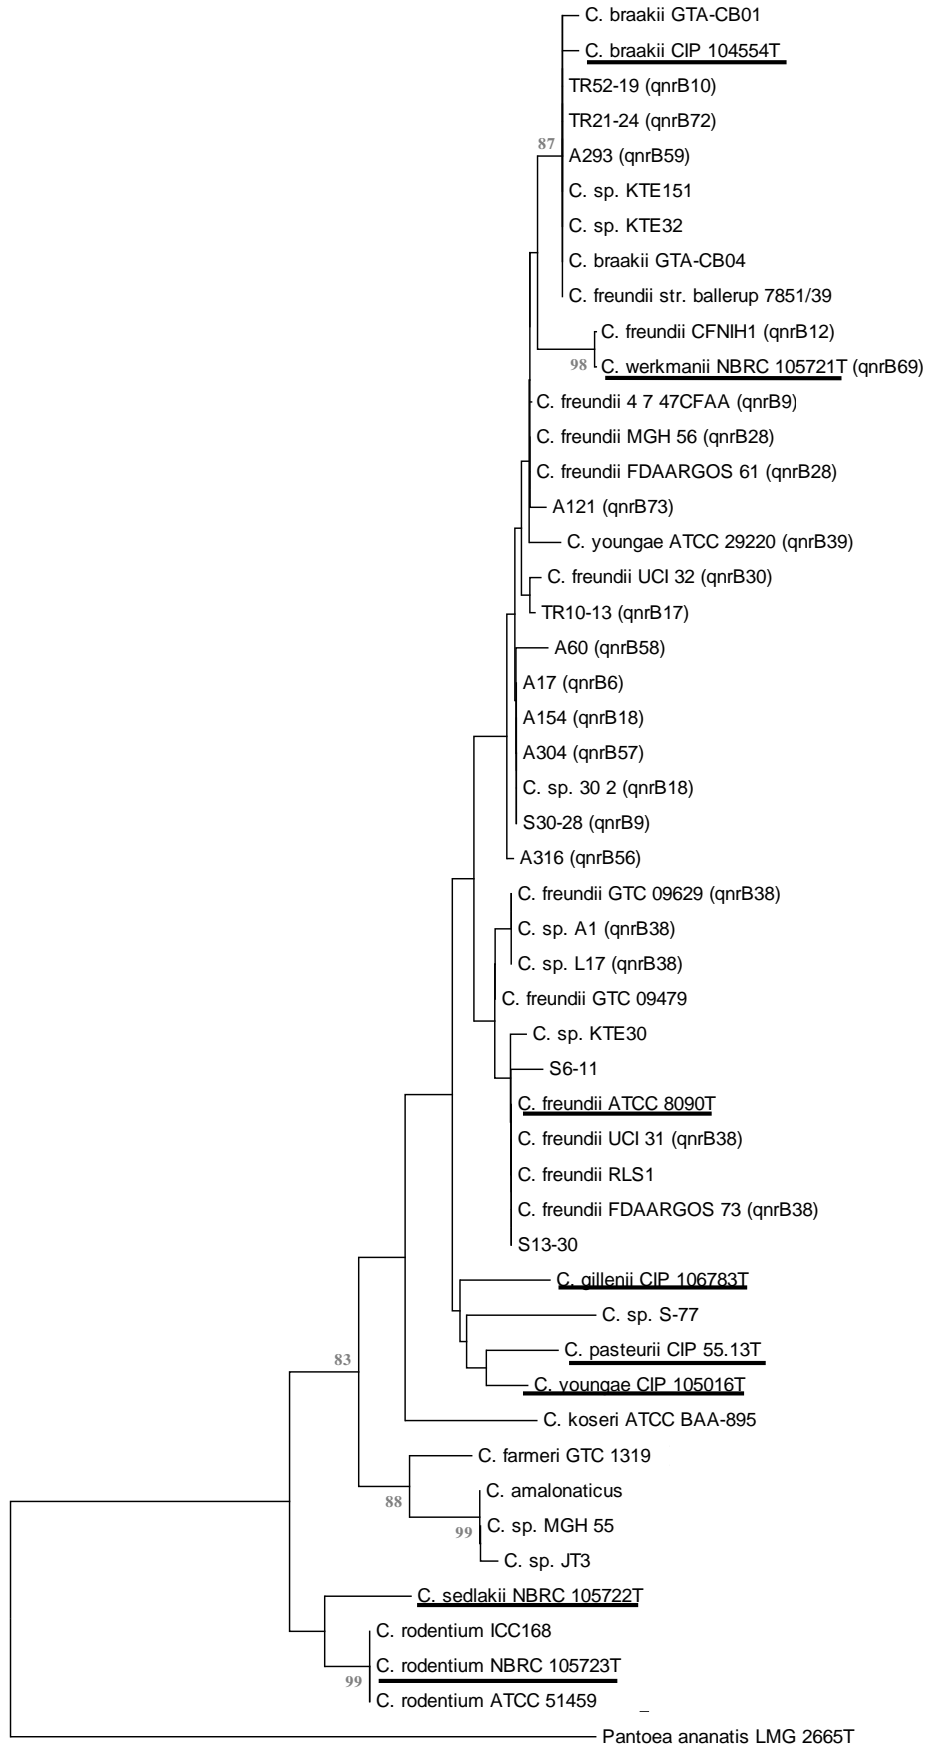

**FIG S2. Affiliation of RecN amino acid sequences.** Genetic distances were constructed using Jones-Taylor-Thornton (JTT) model. Numbers at branch points indicate bootstrap percentages from Neighbor-Joining method analysis and only values greater than 80% are shown. Horizontal Bar: genetic distance of 0.05. All the different *Citrobacter* spp. type strains are underlined and *qnrB* alleles are shown in parentheses. *Pantoea ananatis* LMG 2665<sup>T</sup> was used as outgroup (PATRIC ID fig|1378093.3.peg.2577).

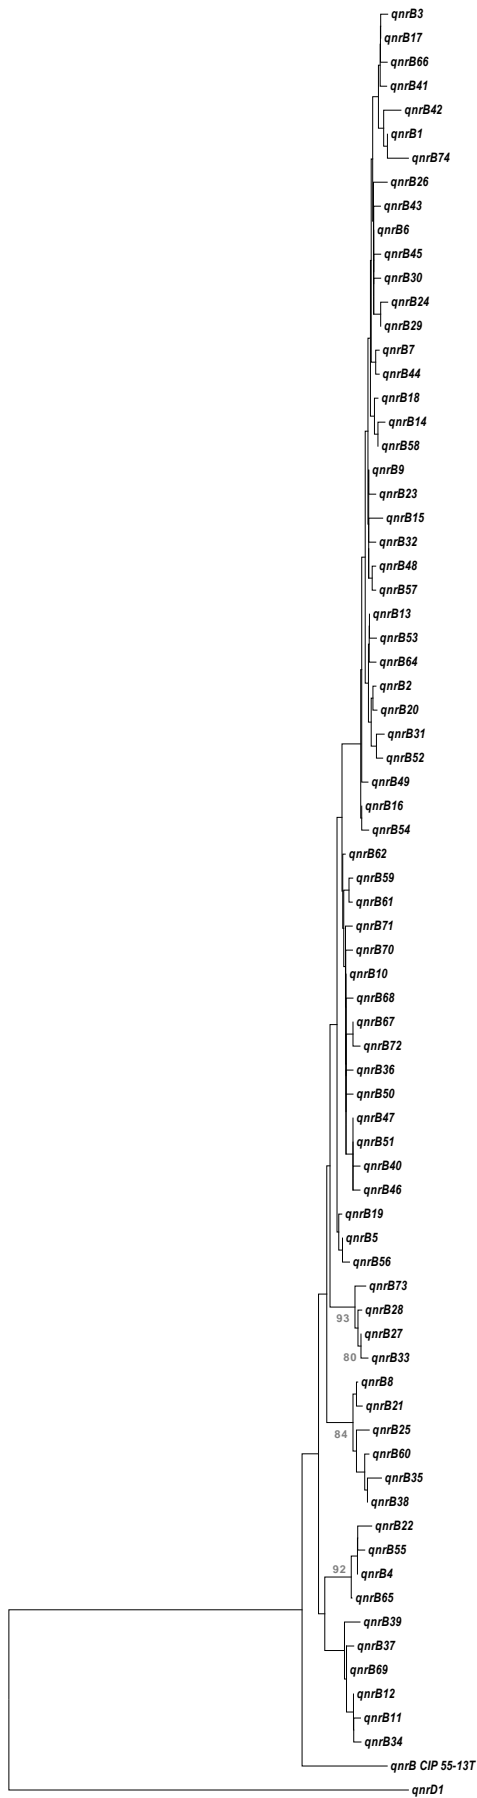

0.05

**FIG S3. Affiliation of QnrB amino acid sequences.** Genetic distances were constructed using Jones-Taylor-Thornton (JTT) model. Numbers at branch points indicate bootstrap percentages from Neighbor-Joining method analysis and only values greater than 80% are shown. Horizontal Bar: genetic distance of 0.05. QnrD1 was used as outgroup (GenBank accession number ACG70184).

**TABLE S1. Epidemiological data of *Citrobacter* spp. isolates harboring complete or truncated *qnrB* genes characterized in this study.**

| Isolate | Phylogenetic assignment <sup>a</sup> | Origin (sample)               | PFGE-type (no.) | <i>qnrB</i> allele <sup>b</sup> | Antibiotic resistance pattern <sup>c, d, e</sup> |
|---------|--------------------------------------|-------------------------------|-----------------|---------------------------------|--------------------------------------------------|
| A17     | <i>Citrobacter</i> sp. I             | Water well (W1)               | A (1)           | <i>qnrB6</i>                    | IPM, NAL, SUL, (KAN), (STR)                      |
| A313    | <i>Citrobacter</i> sp. I             | Natural Spring (W63)          | B (3)           | <i>qnrB56</i>                   | (ATM), NAL, SUL, (TET)                           |
| A314    |                                      |                               |                 |                                 |                                                  |
| A316    |                                      |                               |                 |                                 |                                                  |
| A304    | <i>Citrobacter</i> sp. I             | Fountain (W60)                | C (2)           | <i>qnrB57</i>                   | KAN, STR, NAL, SUL, (TET)                        |
| A305    |                                      |                               |                 |                                 |                                                  |
| A60     | <i>Citrobacter</i> sp. I             | Water well (W13)              | D (1)           | <i>qnrB58</i>                   | STR, NAL, SUL                                    |
| A154    | <i>Citrobacter</i> sp. I             | Borehole (W33)                | E (1)           | <i>qnrB18</i>                   | STR, NAL, SUL                                    |
| S30-28  | <i>Citrobacter</i> sp. I             | Ready-to-eat salads (S30)     | F (1)           | <i>qnrB9</i>                    | NAL                                              |
| TR10-13 | <i>Citrobacter</i> sp. I             | Aquaculture (feed) (AQ10)     | G (1)           | <i>qnrB17</i>                   |                                                  |
| A121    | <i>Citrobacter</i> sp. III           | Water well (W23)              | H (1)           | <i>qnrB73</i>                   | NAL, SUL                                         |
| A293    | <i>C. braakii</i>                    | Borehole (W57)                | I (3)           | <i>qnrB59</i>                   | STR, NAL, SUL, (TET)                             |
| A295    |                                      |                               |                 |                                 |                                                  |
| A297    |                                      |                               |                 |                                 |                                                  |
| TR21-24 | <i>C. braakii</i>                    | Aquaculture (sediment) (AQ21) | J (2)           | <i>qnrB72</i>                   | NAL, TET                                         |
| TR21-25 |                                      |                               |                 |                                 |                                                  |
| TR52-19 | <i>C. braakii</i>                    | Trout (AQ52)                  | K (3)           | <i>qnrB10</i>                   | NAL, TET                                         |
| TR52-21 |                                      |                               |                 |                                 |                                                  |
| TR52-22 |                                      |                               |                 |                                 |                                                  |
| S6-11   | <i>C. freundii</i>                   | Ready-to-eat salads (S6)      | L (1)           | $\Delta qnrB$                   | NAL, SUL, STR                                    |
| S13-30  | <i>C. freundii</i>                   | Ready-to-eat salads (S13)     | M (1)           | $\Delta qnrB$                   | SUL, STR                                         |

<sup>a</sup>Species identification according to the phylogenetic affiliation obtained with *leuS* and *recN* genes.

<sup>b</sup>All the different *qnrB* alleles were chromosomally located.

<sup>c</sup>Natural resistance patterns were not included.

<sup>d</sup>Antimicrobial agents tested [disk diffusion method according to EUCAST (<http://www.eucast.org/>) guidelines and breakpoints or following Clinical and Laboratory Standards Institute recommendations (<http://clsi.org/>) for antibiotics not considered in the EUCAST documents]:  $\beta$ -lactam (FEP, cefepime; ATM, aztreonam; IPM, imipenem; ERT, ertapenem) and non- $\beta$ -lactam (AMK, amikacin; GEN, gentamicin; KAN, kanamycin; NET, netilmicin; STR, streptomycin; TOB, tobramycin; SUL, sulfonamides; TMP, trimethoprim; TET, tetracycline; CHL, chloramphenicol; CIP, ciprofloxacin; NAL, nalidixic acid) antibiotics.

<sup>e</sup>Variable presence of a given resistance phenotype is indicated in parentheses.



**TABLE S2. Phylogenetic assignment of *Citrobacter* spp. isolates harboring or not *qnrB* genes.**

| Phylogenetic assignment <sup>a</sup> | Isolate                                                             | <i>qnrB</i> allele | GenBank accession number | Accession numbers (GenBank/PATRIC) |                       |
|--------------------------------------|---------------------------------------------------------------------|--------------------|--------------------------|------------------------------------|-----------------------|
|                                      |                                                                     |                    |                          | <i>leuS</i>                        | <i>recN</i>           |
| <i>C. freundii</i>                   | CIP57-32 <sup>T</sup> = <i>C. freundii</i> ATCC 8090 <sup>T</sup>   | $\Delta qnrB$      | AB734052                 | EKS58631                           | EKS56099              |
| <i>C. freundii</i>                   | <i>C. freundii</i> GTC 09479                                        | $\Delta qnrB$      | NZ_AOMS01000003          | EMF20765                           | EMF22422              |
| <i>C. freundii</i>                   | <i>C. freundii</i> RLS1                                             | $\Delta qnrB$      | NZ_JATT01000060          | EXF29472                           | EXF30442              |
| <i>C. freundii</i>                   | <i>C. sp.</i> KTE30                                                 | $\Delta qnrB$      | ASQJ01000007             | EOQ25427                           | EOQ21965              |
| <i>C. freundii</i>                   | S6-11                                                               | $\Delta qnrB$      | NA                       | KR998039                           | KR998026              |
| <i>C. freundii</i>                   | S13-30                                                              | $\Delta qnrB$      | NA                       | KR998040                           | KR998027              |
| <i>C. freundii</i>                   | <i>C. freundii</i> GTC 09629                                        | <i>qnrB38</i>      | NZ_AOUE01000004          | EOD61956                           | EOD59147              |
| <i>C. freundii</i>                   | <i>C. sp.</i> A1                                                    | <i>qnrB38</i>      | NZ_AKTT01000018          | EJF24310                           | EJF20625              |
| <i>C. freundii</i>                   | <i>C. sp.</i> L17                                                   | <i>qnrB38</i>      | NZ_AMPE01000004          | EKU36588                           | EKU31915              |
| <i>C. freundii</i>                   | <i>C. freundii</i> UCI31                                            | <i>qnrB38</i>      | JAPB01000002             | ETX72722                           | ETX69942              |
| <i>C. freundii</i>                   | <i>C. freundii</i> FDAARGOS_73                                      | <i>qnrB38</i>      | JTBJ01000001             | KGY84667                           | KGY86553              |
| <i>C. braakii</i>                    | CIP 104554 <sup>T</sup> = <i>C. braakii</i> ATCC 51113 <sup>T</sup> | <i>qnrB61</i>      | AB734053                 | KM515986                           | KF057886              |
| <i>C. braakii</i>                    | <i>C. braakii</i> GTA-CB01                                          | -                  | JRHK01000002             | KHE06528                           | KHE04073              |
| <i>C. braakii</i>                    | <i>C. braakii</i> GTA-CB04                                          | -                  | JRHL01000001             | KHE09771                           | KHE09463              |
| <i>C. braakii</i>                    | <i>C. freundii</i> str. ballerup 7851/39                            | NA                 | NA                       | fig 670484.3.peg.401               | fig 670484.3.peg.2509 |
| <i>C. braakii</i>                    | <i>C. sp.</i> KTE151                                                | $\Delta qnrB$      | ASQK01000005             | EOQ50286                           | EOQ47363              |
| <i>C. braakii</i>                    | <i>C. sp.</i> KTE32                                                 | -                  | ASQL01000009             | EOQ32555                           | EOQ28285              |
| <i>C. braakii</i>                    | TR52-19                                                             | <i>qnrB10</i>      | KP339256                 | KR998044                           | KR998031              |
| <i>C. braakii</i>                    | A293                                                                | <i>qnrB59</i>      | KP339262                 | KR998036                           | KR998023              |
| <i>C. braakii</i>                    | TR21-24                                                             | <i>qnrB72</i>      | KP339263                 | KR998043                           | KR998030              |
| <i>C. youngae</i>                    | CIP 105016 <sup>T</sup>                                             | NA                 | NA                       | KM515993                           | KF057888              |

| Phylogenetic assignment <sup>a</sup> | Isolate                                                                | <i>qnrB</i> allele | GenBank accession number | Accession numbers (GenBank/PATRIC) |                        |
|--------------------------------------|------------------------------------------------------------------------|--------------------|--------------------------|------------------------------------|------------------------|
|                                      |                                                                        |                    |                          | <i>leuS</i>                        | <i>recN</i>            |
| <i>C. werkmanii</i>                  | CIP 104555 <sup>T</sup> = <i>C. werkmanii</i> NBRC 105721 <sup>T</sup> | <i>qnrB69</i>      | BBMW01000005             | GAL44920                           | GAL47081               |
| <i>C. werkmanii</i>                  | <i>C. freundii</i> CFNIH1                                              | <i>qnrB12</i>      | CP007557                 | WP_038638761                       | AHY14573               |
| <i>C. amalonaticus</i>               | CIP 82.89 <sup>T</sup>                                                 | NA                 | NA                       | EU010040                           | n.a.                   |
| <i>C. amalonaticus</i>               | <i>C. amalonaticus</i>                                                 | -                  | JMQQ01000039             | KEY47803                           | KEY45284               |
| <i>C. amalonaticus</i>               | <i>C. sp.</i> JT3                                                      | NA                 | NA                       | fig 1451265.3.peg.2413             | fig 1451265.3.peg.1330 |
| <i>C. amalonaticus</i>               | <i>C. freundii</i> MGH55                                               | -                  | JMUK01000018             | KDF04575                           | KDF07738               |
| <i>C. farmeri</i>                    | CIP 104553 <sup>T</sup>                                                | NA                 | NA                       | KM515987                           | n.a.                   |
| <i>C. farmeri</i>                    | <i>C. farmeri</i> GTC1319                                              | -                  | NZ_BBMX01000005          | GAL49434                           | GAL51860               |
| <i>C. koseri</i>                     | CIP 82.87 <sup>T</sup> = <i>C. koseri</i> ATCC 27028 <sup>T</sup>      | -                  | AB734056                 | KM515994                           | n.a.                   |
| <i>C. koseri</i>                     | <i>C. koseri</i> ATCC BAA-895                                          | -                  | CP000822                 | YP_001454059                       | YP_001455447           |
| <i>C. rodentium</i>                  | <i>C. rodentium</i> NBRC 105723 <sup>T</sup>                           | -                  | NZ_BBNA01000024          | fig 1218085.3.peg.3980             | fig 1218085.3.peg.4189 |
| <i>C. rodentium</i>                  | <i>C. rodentium</i> ATCC 51459                                         | -                  | JXUN01000211             | KIQ50925                           | KIQ49016               |
| <i>C. rodentium</i>                  | <i>C. rodentium</i> ICC168                                             | -                  | FN543502                 | YP_003364286                       | YP_003366100           |
| <i>C. sedlakii</i>                   | <i>C. sedlakii</i> NBRC 105722 <sup>T</sup>                            | -                  | NZ_BBNB01000001          | fig 1218086.3.peg.1142             | fig 1218086.3.peg.2278 |
| <i>C. pasteurii</i>                  | CIP55-13 <sup>T</sup>                                                  | <i>qnrBnew</i>     | CDHL01000019             | CEJ66010                           | CEJ67563               |
| <i>C. murlinae</i>                   | CIP 104556 <sup>T</sup>                                                | NA                 | NA                       | KM515989                           | n.a.                   |
| <i>C. murlinae</i>                   | <i>C. sp.</i> S-77                                                     | NA                 | NA                       | fig 1080067.3.peg.1081             | fig 1080067.3.peg.3390 |
| <i>C. gillanii</i>                   | CIP 106783 <sup>T</sup>                                                | NA                 | NA                       | KM515988                           | KF057887               |
| <i>Citrobacter sp.</i> I             | A17                                                                    | <i>qnrB6</i>       | KP339254                 | KR998032                           | KR998019               |
| <i>Citrobacter sp.</i> I             | S30-28                                                                 | <i>qnrB9</i>       | KP339255                 | KR998041                           | KR998028               |
| <i>Citrobacter sp.</i> I             | <i>C. freundii</i> 4_7_47CFAA                                          | <i>qnrB9</i>       | ADLG01000026             | EHL82656                           | EHL86564               |

| Phylogenetic assignment <sup>a</sup> | Isolate                 | <i>qnrB</i> allele | GenBank accession number | Accession numbers (GenBank/PATRIC) |             |
|--------------------------------------|-------------------------|--------------------|--------------------------|------------------------------------|-------------|
|                                      |                         |                    |                          | <i>leuS</i>                        | <i>recN</i> |
| <i>Citrobacter</i> sp. I             | TR10-13                 | <i>qnrB17</i>      | KP339257                 | KR998042                           | KR998029    |
| <i>Citrobacter</i> sp. I             | A154                    | <i>qnrB18</i>      | KP339258                 | KR998035                           | KR998022    |
| <i>Citrobacter</i> sp. I             | C. sp. 30_2             | <i>qnrB18</i>      | ACDJ02000027             | ZP_04561108                        | ZP_04560012 |
| <i>Citrobacter</i> sp. I             | C. freundii UCI32       | <i>qnrB30</i>      | JAPA01000008             | ETX65167                           | ETX61851    |
| <i>Citrobacter</i> sp. I             | A304                    | <i>qnrB57</i>      | KP339260                 | KR998037                           | KR998024    |
| <i>Citrobacter</i> sp. I             | A60                     | <i>qnrB58</i>      | KP339261                 | KR998033                           | KR998020    |
| <i>Citrobacter</i> sp. I             | A316                    | <i>qnrB56</i>      | KP339259                 | KR998038                           | KR998025    |
| <i>Citrobacter</i> sp. II            | C. youngae ATCC 29220   | <i>qnrB39</i>      | ABWL02000005             | ZP_03835838                        | ZP_03838025 |
| <i>Citrobacter</i> sp. III           | C. freundii FDAARGOS_61 | <i>qnrB28</i>      | JTBV01000001             | KGZ32966                           | KGZ31013    |
| <i>Citrobacter</i> sp. III           | C. freundii MGH56       | <i>qnrB28</i>      | JMUJ01000007             | KDF21035                           | KDF13460    |
| <i>Citrobacter</i> sp. III           | A121                    | <i>qnrB73</i>      | KP339264                 | KR998034                           | KR998021    |

<sup>a</sup>Species identification according to the phylogenetic affiliation obtained with *leuS* and *recN* genes. NA, not attainable. *Citrobacter* spp. type strains are indicated in grey shadows.
